# Supplementary material for: PEDOT: PSS/AuNPs-Based Composite as Voltammetric Sensor for the Detection of Pirimicarb
Source: MDPI journal article supplement (doi:10.3390/polym15030739), 2023-01-31
Supplement: s1 [file s1]

Supplementary material for

# PEDOT: PSS/AuNPs-Based Composite as Voltammetric Sensor for the Detection of Pirimicarb

Andrei E. Deller <sup>1,†</sup>, Bruna M. Hryniewicz <sup>1,†</sup>, Camila Pesqueira <sup>1</sup>, Rayta Paim Horta <sup>2</sup>,  
Bruno José Gonçalves da Silva <sup>2</sup>, Saddam Weheabby <sup>3,\*</sup>, Ammar Al-Hamry <sup>3</sup>, Olfa Kanoun <sup>3</sup> and Marcio Vidotti <sup>1,\*</sup>

<sup>1</sup> Grupo de Pesquisa em Macromoléculas e Interfaces, Universidade Federal do Paraná (UFPR), Curitiba 81531-980, PR, Brazil

<sup>2</sup> Grupo de Cromatografia e Técnicas de Microextração, Departamento de Química, Universidade Federal do Paraná–UFPR, C.P. 19032, Curitiba 81531-980, PR, Brazil

<sup>3</sup> Measurement and Sensor Technology, Chemnitz University of Technology, 09126 Chemnitz, Germany;

\* Correspondence: mvidotti@ufpr.br

† These authors contributed equally to this work.

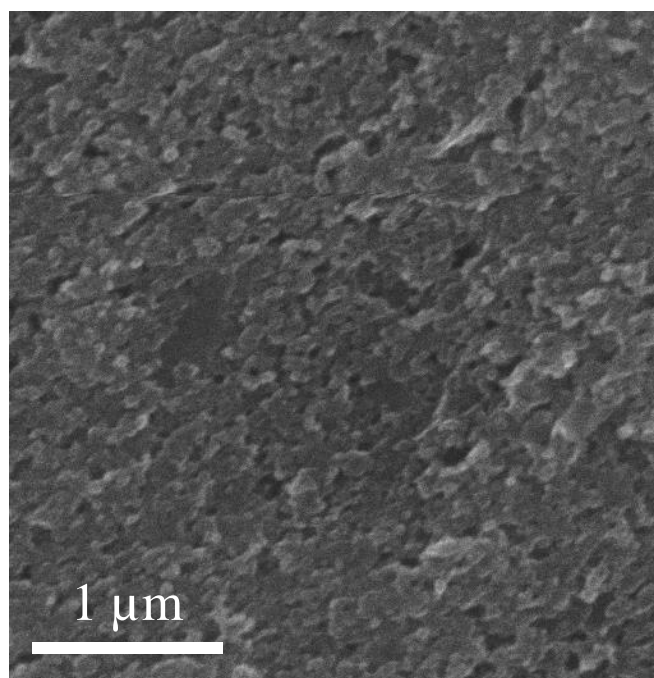

Figure S1. SEM image of bare SPCE.

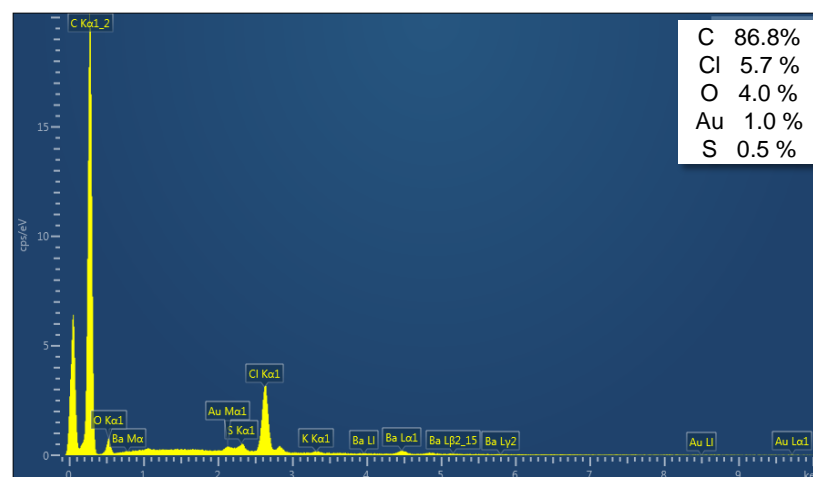

Figure S2. EDS spectra of PEDOT:PSS/AuNPs modified SPCE.

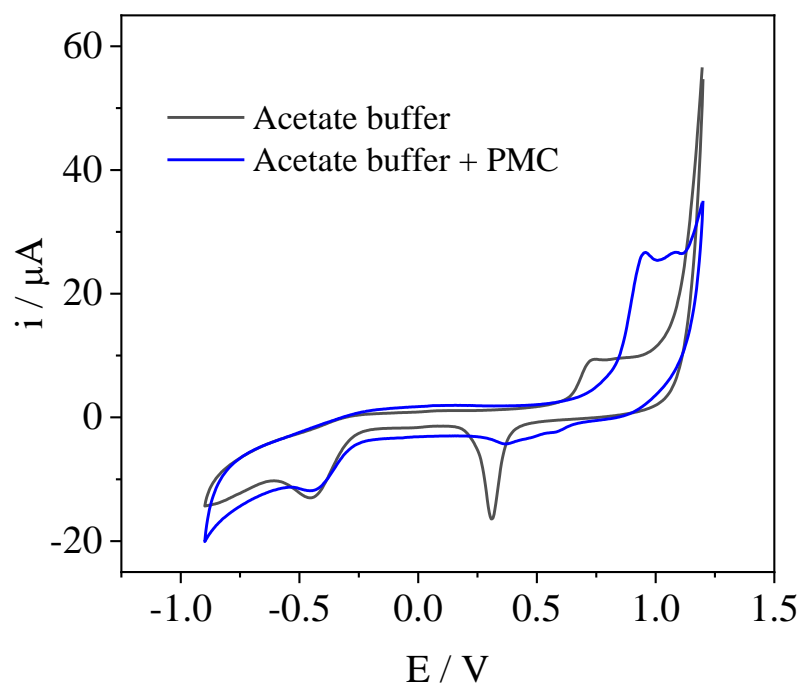

**Figure S3.** Cyclic voltammograms of PEDOT:PSS/AuNPs in acetate buffer pH 5 (a) without PMC (b) and in the presence of 500  $\mu mol L^{-1}$  PMC at 40  $mV s^{-1}$ .

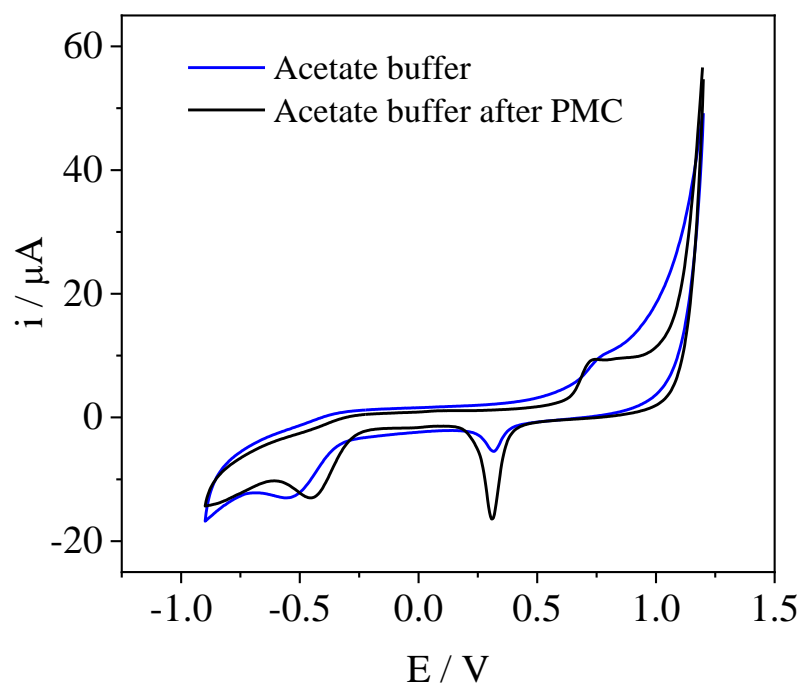

**Figure S4.** Cyclic voltammograms of PEDOT:PSS/AuNPs in acetate buffer pH 5 (a) before and (b) after the detection of 500  $\mu mol L^{-1}$  PMC.

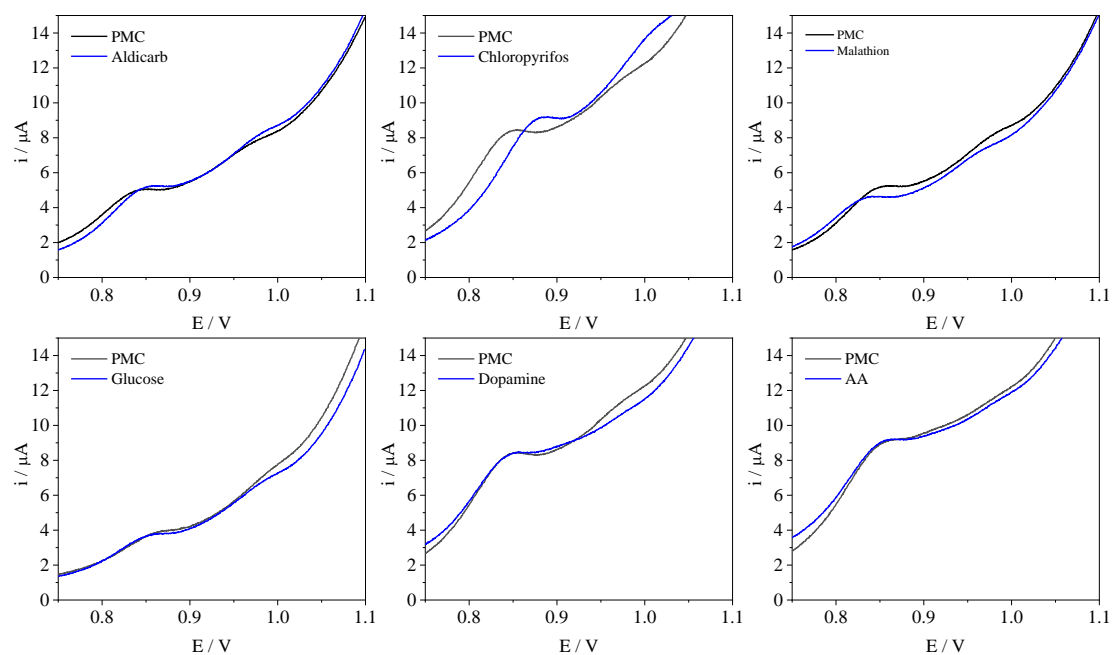

**Figure S5.** Linear voltammograms of 250  $\mu\text{mol L}^{-1}$  PMC in the presence of different interferents at the same concentration.
